# Supplementary material
Source: PubMed Central journal article supplement (PMC60869)
Supplement: pnas_231474698_1.pdf [file pnas_231474698_1.pdf]

Supporting information for Van Cromphaut *et al.* (October 30, 2001) *Proc. Natl. Acad. Sci. USA*, 10.1073/pnas.231474698.

**Table 4. Primers and probes for quantitative reverse transcription–PCR**

| Gene                       | Accession | Forward primer                                        | Probe                                                      | Reverse primer                                |
|----------------------------|-----------|-------------------------------------------------------|------------------------------------------------------------|-----------------------------------------------|
| ECaC                       | AF336378  | 5-CGTTGGTTCTTACGGGTTGAAC-3' (61672-61684/63093-63101) | 5-TGTTTCTCAGATAGCTGCTCTTGTACTTCCTCTTTGT-3' (63198-63162)   | 5-GTTTGGAGAACCACAGAGCCTTA-3' (63229-63252)    |
| CaT1                       | AB037373  | 5-ATCCGCGCTATGCACA-3' (2129-2145)                     | 5-TTCCAGCAACAAGATGGCCTACTCTGA-3' (2150-2178)               | 5-AGTTTTTCTCCTGAATCTTTTCCAA-3' (2183-2208)    |
| Calbindin-D <sub>9K</sub>  | AF028071  | 5-CCTGCAGAAATGAAGACATTTT-3' (81-103)                  | 5-CAAAAATATGCAGCCAAGGAAGCGA-3' (105-130)                   | 5-CTCCATCGCCATTCTTATCCA-3' (232-252)          |
| Calbindin-D <sub>28K</sub> | M21531    | 5-AACTGACAGAGATGGCCAGGTTA-3' (603-625)                | 5-ACCAGTGACGAAAAATTCCTTTAAATCCA-3' (628-660)               | 5-TGAACTCTTTCCACACATTTTGAT-3' (665-689)       |
| PMCA <sub>1b</sub>         | W97377    | 5-OGCCATCTTCTGCACCATT-3' (268-286)                    | 5-CAGCTGAAAGGCTTCCCGCCAAA-3' (326-348)                     | 5-CAGCCATTGCTCTATTGAAAGTTC-3' (353-376)       |
| NCX                        | U70033    | 5-TCCCTACAAAACATTTGAAGGCACA-3' (1807-1831)            | 5-ACCTTGACTGATATTGTTTTGACTATTTTCATCATTCTGGA-3' (1881-1920) | 5-TTTCATCATCTCCTCGTCATCGATT-3' (1921-1945)    |
| VDR                        | D31969    | 5-GGATCTGTGGAGTGTGTGGAGACC-3' (173-196)               | 5-CTGTTCACTGCCCCCTTCAATGGAGAT-3' (277-303)                 | 5-CTTCATCATGCCAATGCCACGCAG-3' (357-381)       |
| Cyp27B1                    | AF286219  | 5-ATGTTTGCCCTTGGCCAGAG-3' (1909-1921/1995-2001)       | 5-CCCTGGTTCCTCATCGCAGCTTCA-3' (2023-2046)                  | 5-GACGGCATATCCTCCTCAGG-3' (2051-2070)         |
| HPRT                       | NM 013556 | 5-TTATCAGACTGAAGAGCTACTGTAATGATC-3' (383-412)         | 5-TGAGAGATCATCTCCCAATAACTTTTATGTCCC-3' (422-456)           | 5-TTACCAAGTGCAATTATATCTTCAACAATC-3' (480-509) |

Accession number, PCR primers, and fluorescent probes (5'FAM-3'TAMRA) for mouse ECaC, CaT1, calbindin-D<sub>9K</sub>, calbindin-D<sub>28K</sub>, PMCA<sub>1b</sub>, NCX, VDR, Cyp27B1, and HPRT. Primers and probes were designed by using the computer program Primer Express (PE Biosystems) and were purchased from Amersham Pharmacia Biotech (primers) and Eurogentec [Seraing, Belgium (probes)].

ECaC, epithelial calcium channel; CaT1, calcium transport protein type 1; PMCA<sub>1b</sub>, plasma membrane calcium ATPase; NCX, Na<sup>+</sup>/Ca<sup>2+</sup> exchanger; VDR, Vitamin D receptor; HPRT, hypoxanthine-guanine phosphoribosyl transferase.

Recommendation: View file at 200%.
