# Supplementary material
Source: PubMed Central journal article supplement (PMC60869)
Supplement: pnas_231474698_2.pdf [file pnas_231474698_2.pdf]

**Table 5. Effect of a single dose of 1,25(OH)<sub>2</sub>D<sub>3</sub> on gene expression in duodenum and kidney of wild-type mice**

|                 |                            | Vehicle | 1.25(OH) <sub>2</sub> D <sub>3</sub> |
|-----------------|----------------------------|---------|--------------------------------------|
| <i>Duodenum</i> | CAT1                       | 1 ± 0,2 | 6,5 ± 0.8*                           |
|                 | ECaC                       | 1 ± 0,1 | 1,6 ± 0.2 <sup>†</sup>               |
|                 | calbindin-D <sub>9K</sub>  | 1 ± 0,2 | 2,2 ± 0.3 <sup>†</sup>               |
|                 | PMCA <sub>1b</sub>         | 1 ± 0,1 | 1,8 ± 0.2 <sup>‡</sup>               |
| <i>Kidney</i>   | ECaC                       | 1 ± 0,2 | 2,8 ± 0.2*                           |
|                 | CAT1                       | 1 ± 0,2 | 2,2 ± 0.3 <sup>†</sup>               |
|                 | calbindin-D <sub>9K</sub>  | 1 ± 0,2 | 1,6 ± 0.2 <sup>‡</sup>               |
|                 | calbindin-D <sub>28K</sub> | 1 ± 0,3 | 0,6 ± 0,2                            |
|                 | PMCA <sub>1b</sub>         | 1 ± 0,2 | 0,8 ± 0,1                            |
|                 | NCX                        | 1 ± 0,3 | 0,3 ± 0.1 <sup>‡</sup>               |

RNA levels, assessed by qRT-PCR, are calculated as a ratio to the HPRT RNA level and are expressed relative to levels of the vehicle-treated group.

\*,  $P < 0.001$ ; <sup>†</sup>,  $P < 0.01$ ; <sup>‡</sup>,  $P < 0.05$  vs. vehicle. qRT-PCR, quantitative RT-PCR.

Recommendation: View file at 200%.
